# Supplementary material for: Variation in Cell Wall Metabolism and Flesh Firmness of Four Apple Cultivars during Fruit Development
Source: MDPI journal article supplement (doi:10.3390/foods11213518), 2022-11-04
Supplement: s1 [file s1]

*Supplementary Material*

Qiufang Su, Xianglu Li, Lexing Wang, Bochen Wang, Yifeng Feng, Huijuan Yang, Zhengyang Zhao\*

\*Correspondence: Zhengyang Zhao

**Table S1.** The primers used for qRT-PCR

| Primer name           | Forward primer              | Reverse primer              |
|-----------------------|-----------------------------|-----------------------------|
| MdPL1-qPCR            | CTTACGGGGGAGGA<br>GGGTG     | TGGGCAATGTGCTG<br>GAAGA     |
| MdPL2-qPCR            | CATCCTGTAAACCCT<br>AAACCCG  | CTACCACCAAAAAT<br>GGAGACCC  |
| MdXTH-qPCR            | ACAGTCTGGCTTGAT<br>AGCACCAC | AACACTTTTCCTAGC<br>ATACCTCC |
| MdPG-qPCR             | CGACTTCGCCACCAC<br>CGT      | CCGAGCCCAAAGCC<br>ATAAA     |
| MdACO1-qPCR           | GACTTGGACTGGGA<br>AAGCAC    | GGAGGGTAGTTGCT<br>GACCTT    |
| MdACS1-qPCR           | AGCCTCTCTAAGGAT<br>CTTGG    | TGGTTCTCGGCTATG<br>TAGTTCTT |
| MdActin-qPCR          | CTTCAATGTGCCTGC<br>CATGTAT  | AATTTCCCGTTCAGC<br>AGTAGTG  |
| Md $\beta$ -gal1-qPCR | GGGAGTTCTTCTGTT<br>GAATGGG  | TTCCGGCATAAGAA<br>CAATCG    |
| Md $\beta$ -gal2-qPCR | CGAAATACCCTGTTA<br>GAGTGAGC | CGATGAATGACTGC<br>CAAGGAA   |

**Table S2.** The genebank accession numbers used for RT-qPCR

|                  |              |
|------------------|--------------|
| MdPL1            | MD16G1070600 |
| MdPL2            | MD16G1106400 |
| MdPG             | MD16G1092600 |
| MdXTH            | MD12G1109400 |
| MdACO1           | MD10G1328100 |
| MdACS1           | MD15G1302200 |
| Md $\beta$ -gal1 | MD02G1079200 |
| Md $\beta$ -gal2 | MD15G1206800 |

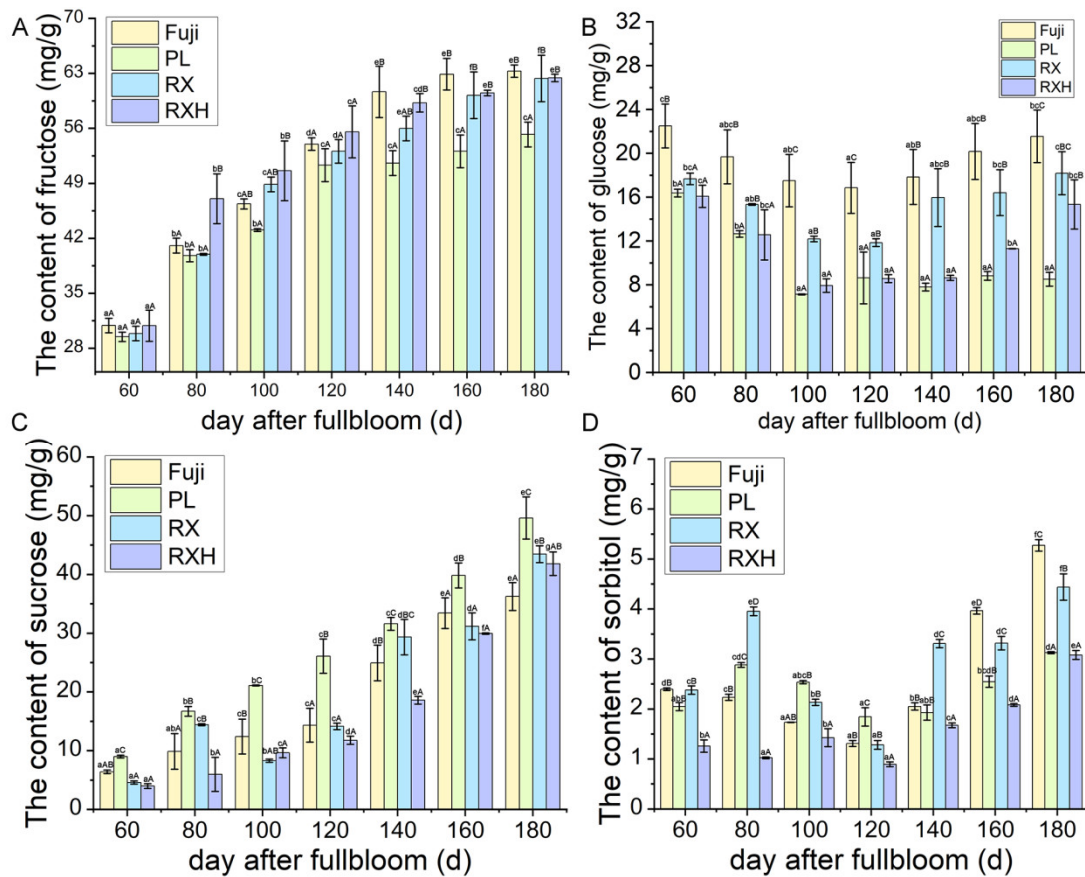

**Figure S1.** The variation of sugar content in 'Ruixue' and 'Ruixianghong' and their parents apples during fruit development. (A) Fructose (B) Glucose (C) Sucrose (D) Sorbitol DAFB: days after full bloom. Different lowercase letters in columns denote significant differences between sampling dates for each cultivar by Duncan's multiple range test ( $p < 0.05$ ). Different capital letters in columns denote significant differences by Duncan's multiple range test ( $p < 0.05$ ) among different cultivars. Different colors represent different cultivars.

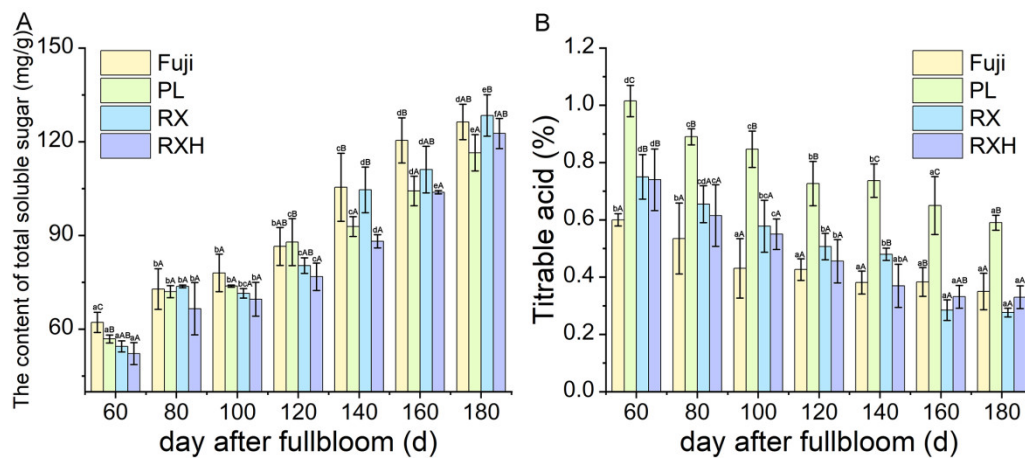

**Figure S2.** The variation of total soluble sugar and titrable acid content in 'Ruixue' and 'Ruixianghong' and their parents apples during fruit development. Different lowercase letters in columns denote significant differences between sampling dates for each cultivar by

Duncan's multiple range test ( $p < 0.05$ ). Different capital letters in columns denote significant differences by Duncan's multiple range test ( $p < 0.05$ ) among different cultivars. Different colors represent different cultivars.
